# Supplementary material for: Effect of CO-pretreatment on the CuO–V2O5/γ-Al2O3 catalyst for NO reduction by CO
Source: Royal Society of Chemistry journal article supplement (doi:10.1039/c4cy00785a), 2014-01-01
Supplement: c4cy00785a1.pdf [file c4cy00785a1.pdf]

# Effect of CO-pretreatment on the CuO-V<sub>2</sub>O<sub>5</sub>/γ-Al<sub>2</sub>O<sub>3</sub> catalyst for NO reduction by CO

Yan Xiong,<sup>a,c</sup> Xiaojiang Yao,<sup>a</sup> Changjin Tang,<sup>a</sup> Lei Zhang,<sup>a</sup> Yuan Cao,<sup>a</sup> Yu Deng,<sup>b</sup> Fei Gao,<sup>b</sup> Lin Dong<sup>\*a, b,</sup>

## 5 Electronic Supplementary Information (ESI) available:

Figure S1 DRIFTS of un-pretreated 03Cu01V and pretreated by CO at 300 or 500 °C

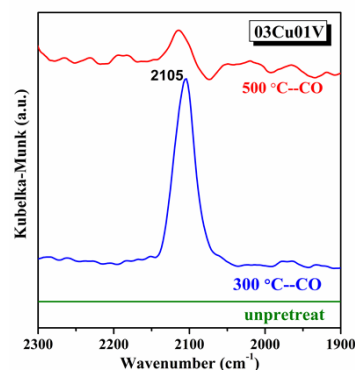

10 Figure S2 Integrated intensity of Cu<sup>+</sup>-CO peaks in *in situ* FT-IR spectra over the catalysts as a function of temperature

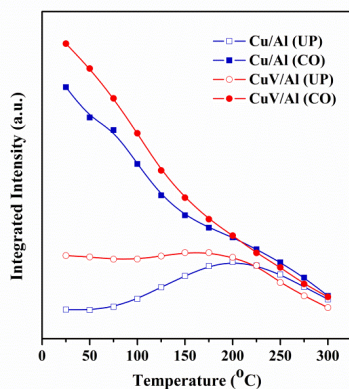

Figure S3 Conversions of 03Cu06V and 03Cu09V after CO-pretreated at different temperatures

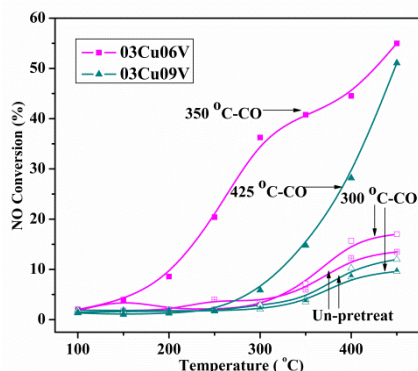

**Table S1** Peak centers and peak areas of  $x\text{Cu}y\text{V}$  catalysts in  $\text{H}_2$ -TPR profiles

| Samples          | 01V   | 03Cu  | 03Cu005V | 03Cu01V | 03Cu03V | 03Cu06V | 03Cu09V |
|------------------|-------|-------|----------|---------|---------|---------|---------|
| Peak center (°C) | 490   | 215   | 248      | 240     | 242     | 265     | 292     |
| Peak area (a.u.) | 15.08 | 48.46 | 68.01    | 88.51   | 122.94  | 181.74  | 238.95  |

**Table S2** EPR spin Hamiltonian parameters of surface copper and vanadium species in 01V, 03Cu and 03Cu01V samples

| Sample      | Signal           | $g_{\parallel}$ | $g_{\perp}$  | $A_{\parallel}$ (G) | $A_{\perp}$ (G) |
|-------------|------------------|-----------------|--------------|---------------------|-----------------|
| 03Cu(UP)    | $\text{Cu}^{2+}$ | 2.330           | 2.079        | 147                 | 40              |
| 01V(CO)     | $\text{V}^{4+}$  | 1.911           | Not resolved | 155                 | Not resolved    |
| 03Cu01V(UP) | $\text{Cu}^{2+}$ | 2.334           | 2.054        | 156                 | Not resolved    |
| 03Cu01V(CO) | $\text{V}^{4+}$  | 1.904           | 2.009        | 168                 | 54              |
